# Supplementary material
Source: PubMed Central journal article supplement (PMC1636584)
Supplement: NIHMS8130-supplement-SF_3_and_4.pdf [file NIHMS8130-supplement-SF_3_and_4.pdf]

## Supplementary Figure 3

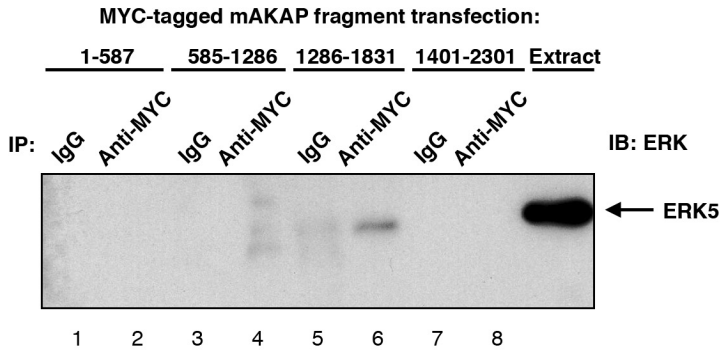

**Supplementary Figure 3.** Mapping of the ERK5 binding fragment on mAKAP. RNVs were infected with adenovirus directed to express the indicated fragments of mAKAP-MYC. The fragments were immunoprecipitated with control (IgG, odd lanes) or anti-MYC (even lanes) antibodies. Endogenous ERK5 co-immunoprecipitated with fragment 1286-1831. Representative immunoblot from three independent experiments is shown.

## Supplementary Figure 4

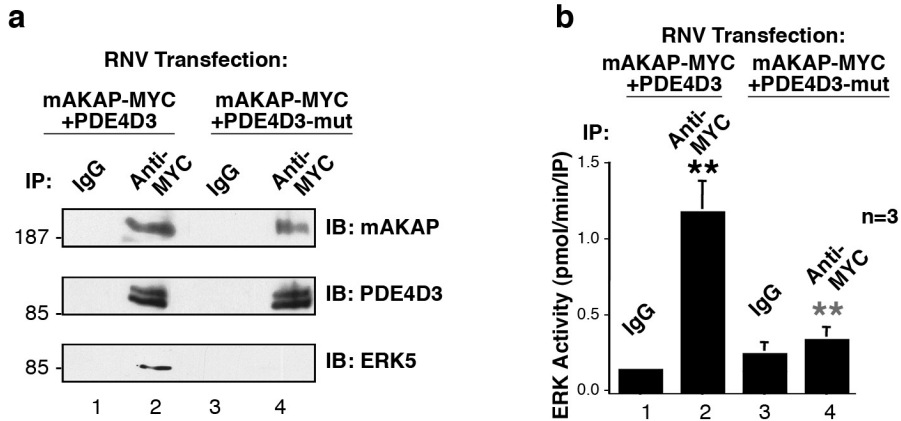

**Supplementary Figure 4.** PDE4D3 links ERK5 to mAKAP. **(a)** Immunoprecipitates from RNV transfected with mAKAP and either PDE4D3 or a PDE4D3 mutant that does not bind ERK5 (K455A/K456A/F597A/Q598A/F599A) were analyzed by immunoblot for co-immunoprecipitated PDE4D3 and ERK5. **(b)** ERK5 activity was measured from each immunoprecipitate using a peptide substrate (n=3, error bars show S.E.M.). P values <0.01 (\*\*) are indicated relative to control (black) and sample (red).
