# Supplementary material
Source: PubMed Central journal article supplement (PMC1636584)
Supplement: NIHMS8130-supplement-SF_5_and_6.pdf [file NIHMS8130-supplement-SF_5_and_6.pdf]

## Supplementary Figure 5

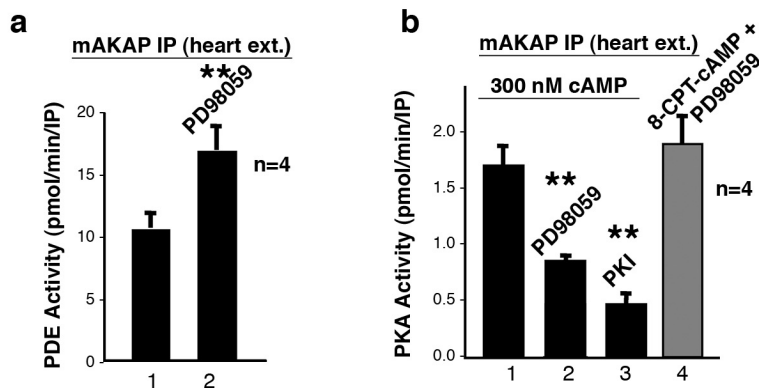

**Supplementary Figure 5.** mAKAP-anchored PDE activity is negatively regulated by ERK.

(a) PDE activity (pmol/min/IP) in mAKAP immunoprecipitates from rat heart extract was measured using cAMP substrate. (b) PKA activity (pmol/min/IP) in mAKAP immunoprecipitates from rat heart extract was measured using Kemptide substrate. Replicate immunoprecipitates were treated with sub-maximal cAMP plus PD98059, PKI, or 8-CPT-cAMP, a cAMP analog resistant to phosphodiesterases (n=4 for each, error bars indicate S.E.M.) P values <0.01 (\*\*) are indicated relative to control.

## Supplementary Figure 6

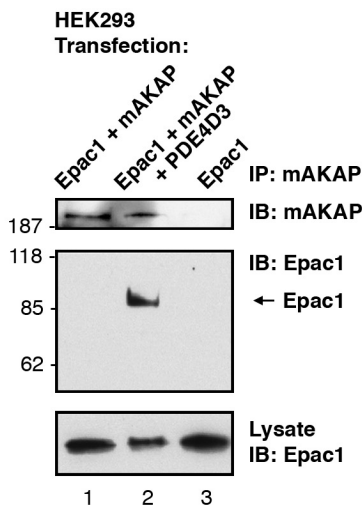

**Supplementary Figure 6.** PDE4D3 serves as an adapter protein to tether Epac1 to the mAKAP complex. mAKAP was immunoprecipitated from HEK293 cells co-transfected with HA-Epac1 and PDE4D3. Immunoprecipitated mAKAP (top) and co-precipitated HA-Epac1 (middle) are shown by immunoblot. Total HA-Epac1 (bottom) is shown by immunoblot.
