# Supplementary material
Source: PubMed Central journal article supplement (PMC1636584)
Supplement: NIHMS8130-supplement-SF_7_and_8.pdf [file NIHMS8130-supplement-SF_7_and_8.pdf]

## Supplementary Figure 7

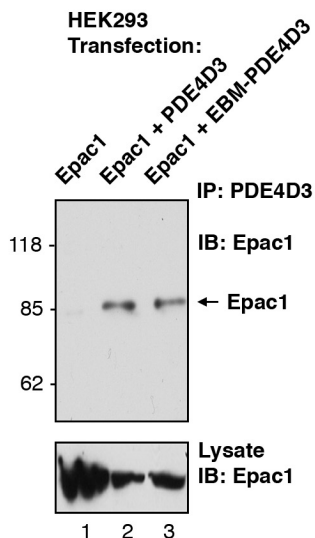

**Supplementary Figure 7.** PDE4D3 tethers Epac1 to the mAKAP complex. Immunoprecipitation of either PDE4D3 or the ERK binding mutant of PDE4D3 (EBM-PDE4D3, K455A/K456A/F597A/Q598A/F599A) from HEK293 cell lysates resulted in coprecipitation of Epac1. This interaction is independent of ERK5.

## Supplementary Figure 8

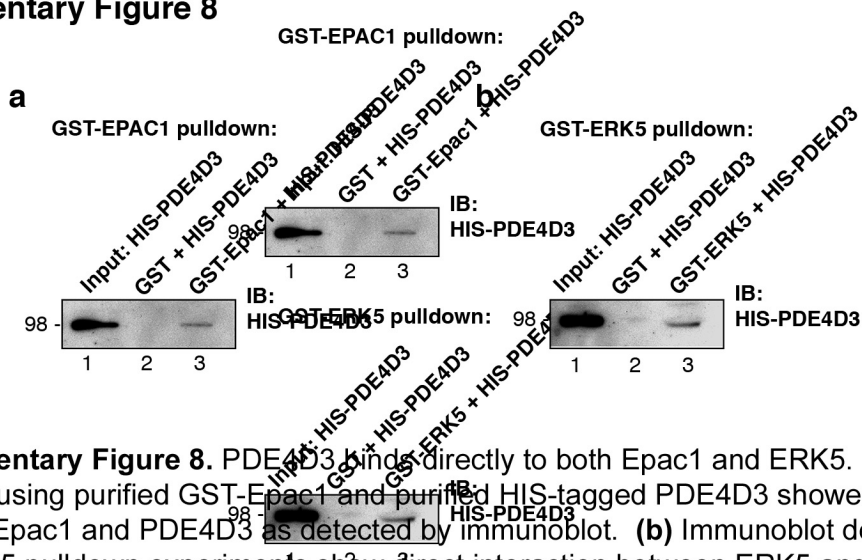

**Supplementary Figure 8.** PDE4D3 binds directly to both Epac1 and ERK5. **(a)** *In vitro* GST-pulldown using purified GST-Epac1 and purified HIS-tagged PDE4D3 showed direct interaction between Epac1 and PDE4D3 as detected by immunoblot. **(b)** Immunoblot detection of similar GST-ERK5 pulldown experiments show direct interaction between ERK5 and PDE4D3.
