# Supplementary material
Source: PubMed Central journal article supplement (PMC1636584)
Supplement: NIHMS8130-supplement-SF_9_and_10.pdf [file NIHMS8130-supplement-SF_9_and_10.pdf]

## Supplementary Figure 9

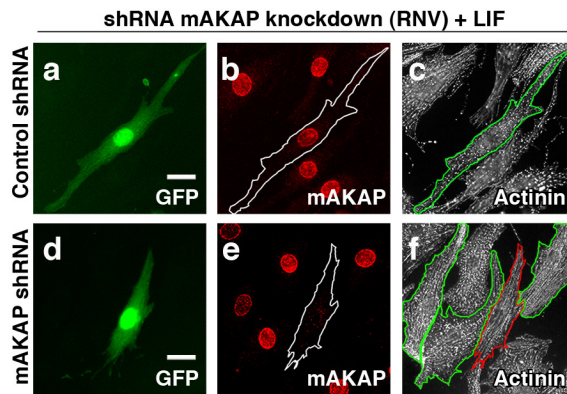

**Supplementary Figure 9.** mAKAP silenced RNV exhibit reduced hypertrophy in response to LIF stimulation. GFP (**a & d**) was used as a marker to identify RNV that were transfected with shRNA. mAKAP expression or knockdown was detected using antibody to mAKAP (**b & e**). Hypertrophic response is observable in cells stained with antibody to actinin (**c & f**). Transfected cells are indicated with a white outline of the cell (**b & e**) and show that RNV not expressing mAKAP fail to respond to LIF stimulation with increased cell size. Representative cells are outlined, scale bar=20 $\mu$ M.

## Supplementary Figure 10

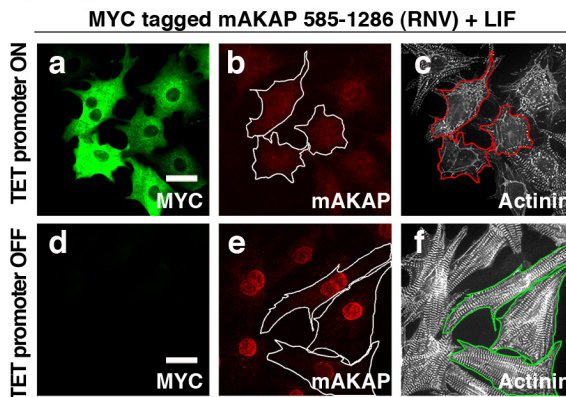

**Supplementary Figure 10.** Expression of mAKAP 585-1286 fragment displaces endogenous mAKAP and ablates LIF induced hypertrophy in RNV. Displacement of mAKAP was achieved by conditional expression of the MYC-tagged mAKAP targeting domain fragment using the TET OFF inducible promoter. RNV were infected with the TET OFF inducible mAKAP-585-1286-MYC adenovirus. Cells cultured with 50ng/ml doxycycline repressed expression of the fragment (TET OFF,) while those cultured in 0.75ng/ml doxycycline permitted moderate expression of the fragment. Immunofluorescent detection of MYC-tagged mAKAP 585-1286 (**a & d**), endogenous mAKAP (**b & e**) and actinin (**c & f**) shows that the hypertrophic response to LIF in cells with displaced mAKAP is blocked. Representative cells are outlined, scale bar=20 $\mu$ M.
